# Supplementary material
Source: PubMed Central journal article supplement (PMC5546036)
Supplement: 10.1074_M117.793539_jbc.M117.793539-1.pdf [file 10.1074_M117.793539_jbc.M117.793539-1.pdf]

**A ciliary opsin in the brain of a marine annelid zooplankton is UV-sensitive and the sensitivity is tuned by a single amino acid residue**

Hisao Tsukamoto, I-Shan Chen, Yoshihiro Kubo, and Yuji Furutani.

**Supplemental Data**

Supplemental Table S1 and supplemental Figs. S1 and S2

**Supplemental Table S1**The list of PCR primers to make Lys-94 mutants of *Platynereis* c-opsin

| primer name         | primer sequence                                                  |
|---------------------|------------------------------------------------------------------|
| c-opsin_forward     | 5'-ccaactgcaagaattccaccatggatggggaaaat-3'                        |
| c-opsin_1D4_reverse | 5'-ccggaatttgcgccgcttaagcaggagccacctgactagtctcggtagcagccacctg-3' |
| K94T_forward        | 5'-tttggaaactgctttcaCgtttatcatcacagcc-3'                         |
| K94T_reverse        | 5'-ggctgtgatgataaacGtgaaagcagttccaaa-3'                          |
| K94A_forward        | 5'-tttggaaactgctttcGCgtttatcatcacagcc-3'                         |
| K94A_reverse        | 5'-ggctgtgatgataaacGCgaaagcagttccaaa-3'                          |
| K94S_forward        | 5'-tttggaaactgctttcaGctttatcatcacagcc-3'                         |
| K94S_reverse        | 5'-ggctgtgatgataaaGctgaaagcagttccaaa-3'                          |
| K94V_forward        | 5'-tttggaaactgctttcGTgtttatcatcacagcc-3'                         |
| K94V_reverse        | 5'-ggctgtgatgataaacACgaaagcagttccaaa-3'                          |
| K94D_forward        | 5'-tttggaaactgctttcGactttatcatcacagcc-3'                         |
| K94D_reverse        | 5'-ggctgtgatgataaaGtCgaaagcagttccaaa-3'                          |
| K94E_forward        | 5'-tttggaaactgctttcGagtttatcatcacagcc-3'                         |
| K94E_reverse        | 5'-ggctgtgatgataaaactCgaaagcagttccaaa-3'                         |
| K94H_forward        | 5'-tttggaaactgctttcCaCtttatcatcacagcc-3'                         |
| K94H_reverse        | 5'-ggctgtgatgataaaGtGgaaagcagttccaaa-3'                          |
| K94R_forward        | 5'-tttggaaactgctttcaGgtttatcatcacagcc-3'                         |
| K94R_reverse        | 5'-ggctgtgatgataaacCtgaaagcagttccaaa-3'                          |

In the sequences of "K94X\_forward" and "K94X\_reverse" primers, mutated sequences are shown in capitals.

UV-sensing opsin in the brain of a zooplankton

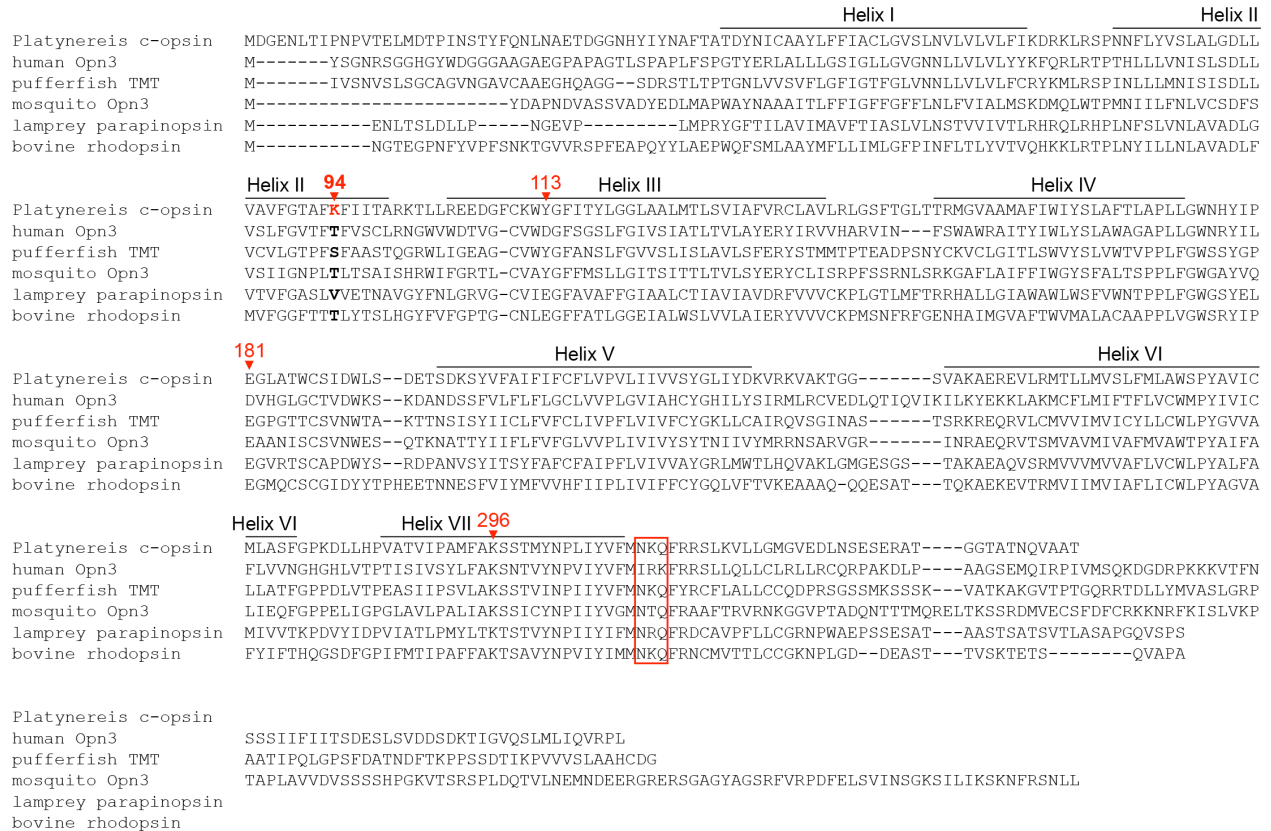

Supplemental Fig. S1 Tsukamoto et al.

**Supplemental Fig. S1. Amino acid sequence alignment of *Platynereis* c-opsin, human Opn3, pufferfish TMT opsin, mosquito Opn3, lamprey parapinopsin, and bovine rhodopsin**

Putative regions corresponding to seven transmembrane helices are indicated. Positions 94, 113, 181, and 296 are also indicated (*red arrowheads*), and amino acid residues at position 94 are highlighted in boldface. Positions 113/181 and 296 are the counterion sites and the retinal-binding site, respectively. The *red box* marks the conserved C-terminal motif of ciliary opsins, but the motif is not conserved in human Opn3. Note that residue numbering in this study is based on the sequence of bovine rhodopsin.

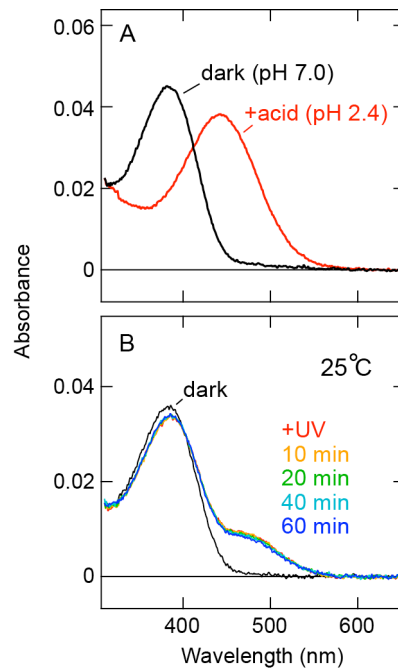

### Supplemental Fig. S2 Tsukamoto et al.

#### **Supplemental Fig. S2. Spectral data supporting arguments in this study.**

*A*, Acid denaturing of *Platynereis* c-opsin to confirm formation of the covalent bond (the Schiff base linkage) with the retinal. 140  $\mu$ L of purified c-opsin (*black*) at pH 7.0 was mixed with 6  $\mu$ L of 1 N HCl, and the final pH value was converted to 2.4 (*red*). The product with  $\lambda_{\text{max}}$  of  $\sim$ 440 nm is due to protonation of the Schiff base linkage and clearly indicate the existence of the covalent bond with the retinal (7). *B*, Thermal stability of the photoproduct of *Platynereis* c-opsin. Purified c-opsin (*black*) was illuminated by UV light (*red*), and kept at 25  $^{\circ}$ C for 10 (*orange*), 20 (*green*), 40 (*pale blue*) and 60 (*blue*) minutes, respectively.
